# Supplementary material for: pH effect on strain-specific transcriptomes of the take-all fungus
Source: PubMed Central journal article supplement (PMC7392285; doi:10.1371/journal.pone.0236429), 2020-07-30
Supplement: pone.0236429.s001.pdf [file pone.0236429.s001.pdf]

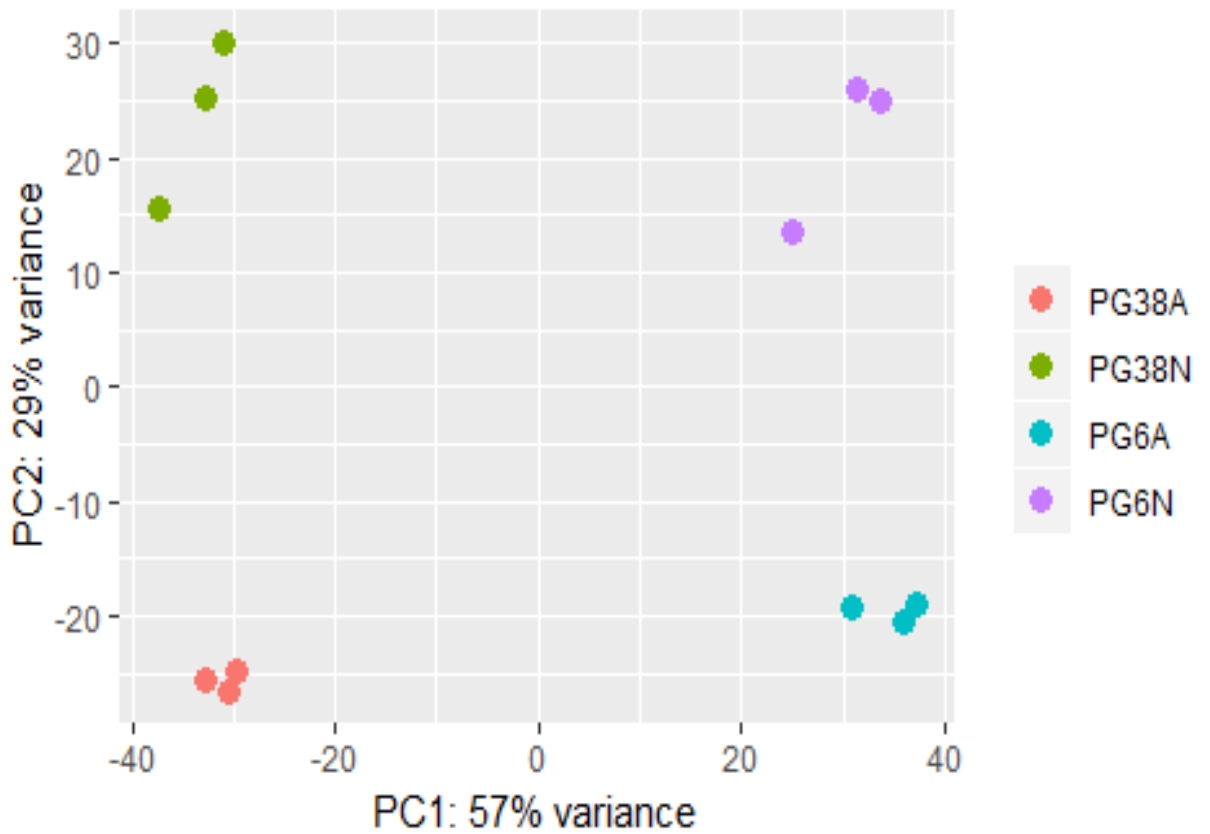

**S1 Fig. Estimation of biological variations by a Principal Component Analysis of the 12 transcript profiles.** X-axis represented the variance on the first axis of the PCA, and the second was plotted on the y-axis. A: acidic pH and N: neutral pH
