# Supplementary material for: pH effect on strain-specific transcriptomes of the take-all fungus
Source: PubMed Central journal article supplement (PMC7392285; doi:10.1371/journal.pone.0236429), 2020-07-30
Supplement: pone.0236429.s002.pdf [file pone.0236429.s002.pdf]

**S1 Table. Composition of the media used in this study.**

| Fahraeus medium            | Product                          | Final Concentration |          |
|----------------------------|----------------------------------|---------------------|----------|
|                            | Glucose                          | 110 mM              |          |
|                            | L-Asparagin                      | 19 mM               |          |
|                            | D,L-Phenylalanin                 | 0.90 mM             |          |
|                            | Adenin                           | 0.20 mM             |          |
|                            | Thiamin-HCl                      | 0.15 µM             |          |
|                            | KH <sub>2</sub> PO <sub>4</sub>  | 7.30 mM             |          |
|                            | Na <sub>2</sub> HPO <sub>4</sub> | 0.56 mM             |          |
|                            | MgSO <sub>4</sub>                | 2 mM                |          |
|                            | CaCl <sub>2</sub>                | 0.09 mM             |          |
|                            | FeSO <sub>4</sub>                | 0.03 mM             |          |
|                            | MnSO <sub>4</sub>                | 4.50 µM             |          |
|                            | ZnSO <sub>4</sub>                | 3.50 µM             |          |
|                            | CuSO <sub>4</sub>                | 8 µM                |          |
|                            | Biotin                           | 1 µM                |          |
|                            | Agar                             | 1.50 % (w/v)        |          |
| Citrate / Phosphate Buffer | Product                          | Volume for 1 L      | Final pH |
|                            | Citrate 0.2 M                    | 537 mL              | 4.6      |
|                            | Disodique phosphate 0.1 M        | 463 mL              |          |
|                            | Citrate 0.2 M                    | 190 mL              | 7.0      |
|                            | Disodique phosphate 0.1 M        | 810 mL              |          |
