# Supplementary material for: pH effect on strain-specific transcriptomes of the take-all fungus
Source: PubMed Central journal article supplement (PMC7392285; doi:10.1371/journal.pone.0236429), 2020-07-30
Supplement: pone.0236429.s003.pdf [file pone.0236429.s003.pdf]

**S2 Table. Oligonucleotide primers used in this study**

| Targeted gene <sup>a</sup> | Source <sup>b</sup><br>Broad Institute / GenBank | Forward primer 5' - 3'  | Reverse primer 5' - 3' | Expected amplicon size (bp) | Annealing temperature (°C) |
|----------------------------|--------------------------------------------------|-------------------------|------------------------|-----------------------------|----------------------------|
| pacC                       | GGTG_01809                                       | caagcgcgatcacatcacct    | gagaaccgagtcgctcggc    | 139                         | 57                         |
| palB                       | GGTG_09525                                       | gcagcaggacatctttgcag    | gcggcatcaaagggatacat   | 243                         | 63                         |
| palC                       | GGTG_06037                                       | aagaagagcggcttccgtt     | ggtatcattttgcttgaccatt | 165                         | 58                         |
| palF                       | GGTG_01551                                       | atgactatggggcaatgggg    | ctccagcttaggtcgaagcgaa | 150                         | 60                         |
| lac1                       | AJ417685/GGTG_02417                              | cgctcgagaggatctttgac    | gtggatggggtgggtgag     | 146                         | 62                         |
| lac2                       | AJ417686/GGTG_02239                              | tccgctggtacctcaactc     | atgacgtaggccactgtc     | 143                         | 62                         |
| gmk1                       | AF258529/GGTG_05241                              | agaagctcctggccttcaac    | ttgctgaggtgtccttgtg    | 160                         | 60                         |
| exo                        | CF554536/GGTG_01690                              | gcgggactggagtactacgg    | gggtcctgccagatggagat   | 146                         | 60                         |
| Wn1                        | Sabater-Muñoz et al., 2006                       | tcatttccttctgggcattc    | gcacaaaacactgccatcaa   | 146                         | 61                         |
| Wn2                        | Sabater-Muñoz et al., 2006                       | gtaacgctcgtcccactttcaat | ctaacgctcggcgtaaactaat | 140                         | 51                         |

<sup>a</sup> *lac1*, laccase 1; *lac2*, laccase 2; *gmk1*, mitogen-activated protein (MAP) kinase; *exo*,  $\beta$ -1,3-exoglucanase; *Wn1*, 3' *Wunen* EST region amplified in qRT-PCR; *Wn2*, 5' *Wunen* EST region amplified in qRT-PCR (Daval et al., 2013).

<sup>b</sup> [http://www.broadinstitute.org/annotation/genome/magnaporthe\\_comparative/GenomesIndex.html](http://www.broadinstitute.org/annotation/genome/magnaporthe_comparative/GenomesIndex.html), GenBank accession number, or reference [24].
